# Supplementary material for: Plasma Galectin-3 predicts deleterious vascular dysfunction affecting post-myocardial infarction patients: An explanatory study
Source: PLoS One. 2020 May 11;15(5):e0232572. doi: 10.1371/journal.pone.0232572 (PMC7213735; doi:10.1371/journal.pone.0232572)
Supplement: S1 Dataset — (XLS) [file pone.0232572.s001.xls]

## Sheet: REMI-PRF-BIO.6-months.PlosOne.M
Age (yrs)	Woman	Body.weight.baseline (kg)	Body.mass.index.baseline	Beta-Blockers.baseline	Enz.conv.inhib.baseline	Hypertension	Systolic.BP.baseline (mmHg)	Diastolic.BP.baseline (mmHg)	Mean.BP.baseline (mmHg)	Heart.rate.baseline (/min)	LV.end-diastolic.volume.baseline (mL/m2)	LV.end-systolic.volume.baseline (mL/m2)	LV.mass.baseline (g/m2)	LV.ejection.fraction.baseline (%)	LV.concentric.remodeling.index.baseline	MI.volume.baseline (%)	LV.microvasc.obstruction.baseline (%)	Stroke.volume.index.baseline (mL/m2)	Cardiac.index.baseline (L/min/m2)	SVR.baseline (mmHg.min.m2/L)	C-Reactive.Protein.baseline (mg/L)	Brain.Natriuretic.Peptide.Baseline (pg/mL)	Galectin-3.Baseline (ng/mL)	Renin.Baseline (pg/mL)	Aldosterone.Baseline (pg/mL)	NGAL.Baseline (ng/mL)	Troponin.Baseline (µg/L)	Creatine.Kinase-MB.Baseline (U/L)			Body.weight.6mo (kg)	Body.mass.index.6mo	Beta-Blockers.6mo	Enz.conv.inhib.6mo	Systolic.BP.6mo (mmHg)	Diastolic.BP.6mo (mmHg)	Mean.BP.6mo (mmHg)	Heart.rate.6mo (/min)	LV.end-diastolic.volume.6mo (mL/m2)	LV.end-systolic.volume.6mo (mL/m2)	LV.mass.6mo (g/m2)	LV.ejection.fraction.6mo (%)	LV.concentric.remodeling.index.6mo	MI.volume.6mo (%)	Stroke.volume.index.6mo (mL/m2)	Cardiac.index.6mo (L/min/m2)	SVR.6mo (mmHg.min.m2/L)	Brain.Natriuretic.Peptide.6mo (pg/mL)	C-Reactive.Protein.6mo (mg/L)
<40	0	95	29.321	1	1	0	100.5	62.5	75.1667	62.8336	82.9751	46.2089	62.3185	44.3099	0.751051	0.0735294	0	39.9183	2.50821	29.9682	13.7	158	13.859	3.018	27.836	100.971	5562	4157			96	29.6296	1	1	138	89	105.333	59.0004	85.0567	42.6037	44.4979	49.9115	0.523155	0.102941	44.2742	2.6122	40.3236	21	0.6
50-59	1	83	25.6173	1	1	0	120.75	66.5	84.5833	65.1673	88.6797	45.881	49.8143	48.2622	0.561733	0.0588235	0.0147059	37.2688	2.42871	34.8265	18.7	195	15.569	5.87	65.49	84.861	2736	983			84	25.9259	1	1	120.6	66.4	84.4667	54.4282	74.0726	36.6909	39.0238	50.4663	0.526832	0.0588235	38.0476	2.07086	40.7882	23	1.9
50-59	1	53	16.358	0	1	0	110	60.75	77.1667	72.4007	87.0743	43.6935	50.574	49.8204	0.580814	0.102941	0	41.6997	3.01909	25.5596	11.6	285	9.561	37.506	21.675	89.221	1193	355			57	17.5926	1	1	105.75	67	79.9167	53.5003	79.088	36.6288	34.2162	53.6861	0.432634	0.0147059	47.1211	2.52099	31.7005	182	0.5
50-59	0	82	25.3086	1	1	0	114.5	73.25	87	69.9997	88.2663	43.3327	54.5382	50.9068	0.617882	0.191176	0.0882353	42.1792	2.95253	29.4663	20.1	115	10.984	40.086	47.285	110.505	96	4251			81	25	1	1	157	87.75	110.833	70.8333	103.543	49.2377	47.5961	52.4471	0.459675	0.279412	49.9616	3.53895	31.3181	100	4.7
50-59	1	94	29.0123	1	1	0	159.25	82	107.75	77.6667	97.7332	53.7594	55.5382	44.9937	0.568264	0.102941	0	43.1067	3.34795	32.1839	14.1	298	19.518		20.788	126.308	1442	850			80	24.6914	1	1	120.4	62.2	81.6	63.1425	99.5221	45.0562	46.5976	54.7275	0.468214	0.0441176	58.0053	3.6626	22.2792	132	1.2
50-59	0	85	26.2346	1	1	0	94.5	53.25	67	59.6669	83.154	48.2446	66.1828	41.9816	0.795906	0.191176	0.0735294	33.2374	1.98317	33.7842	123.8	156	14.325	5.153	26.596	133.094		5740			81	25	1	1	143.6	73	96.5333	51.0002	98.647	42.1734	51.9235	57.2482	0.526357	0.161765	53.6517	2.73625	35.2794	83	1.3
40-49	0	100	30.8642	1	1	0	123.75	73.75	90.4167	59.3327	76.368	40.2632	55.5581	47.2774	0.727506	0.147059	0.0588235	34.2457	2.03189	44.4988	62.3	80	12.211	12.271	23.738	50.469	2617	1463			96	29.6296	1	1	145.25	82.75	103.583	53.1666	84.2704	41.2614	48.919	51.0369	0.580501	0.117647	48.5695	2.58228	40.1132	30	0.5
40-49	0	92	28.3951	0	1	0	126.6	72.6	90.6	80.7144	84.0062	55.9224	72.9679	33.4306	0.868601	0.279412	0.117647	36.7786	2.96856	30.5198	21.9	71	5.366	75.333	179.527	54.081		4869			85	26.2346	0	1	116.8	64.6	82	51.8571	115.211	67.088	57.841	41.7696	0.502044	0.235294	49.5458	2.5693	31.9153	53	1.3
61-69	0	85	26.2346	1	1	1	117.6	74.4	88.8	74.2857	97.1784	58.0176	61.1326	40.2978	0.629076	0.176471	0	40.7159	3.02461	29.3592	19.7	239	3.551	14.867	19.212	86.762	3225	1484			81	25	1	1	156.8	79	104.933	63.9997	88.8152	36.3371	53.3474	59.0868	0.600656	0.132353	49.7494	3.18395	32.957	22	2.5
<40	0	80	24.6914	1	1	1	137.25	85	102.417	70.1668	74.0038	43.286	60.3891	41.5084	0.816027	0	0	28.7274	2.01571	50.8093	3.8	14	4.931	28.228	69.886	48.076	83	169			88	27.1605	1	1	130.6	87.8	102.067	59.1424	84.3432	37.3685	49.0877	55.6947	0.582	0	45.9769	2.71919	37.5357	8	1.2
60-69	1	92	28.3951	1	1	1	158.25	54.75	89.25	71.3331	77.6702	33.5714		56.777		0.0294118	0	42.787	3.05213	29.2418	23.6	240	27.894	279.82	51.383	186.022	3683	1374			92	28.3951	1	1	163.4	83.8	110.333	52.5716	77.3787	34.2014	49.0264	55.8	0.633591	0.0441176	43.7274	2.29882	47.9957	77	17.2
50-59	0	90	27.7778	0	0	1	128.25	86.75	100.583	58.8329	84.7943	49.6402	47.594	41.4581	0.561288	0.294118	0.0147059	37.7692	2.22207	45.2655	22.8	341	13.403	34.225	16.862	60.335	773	3351			90	27.7778	0	0	121.25	74.25	89.9167	62.4997	85.4493	46.5996	43.8505	45.4652	0.513176	0.117647	44.9406	2.80877	32.0128	94	1.2
80-89	0	72	22.2222	1	1	1	125.75	67.25	86.75	63.1673	76.3505	38.8694	52.1368	49.0908	0.682862	0.0882353	0.0147059	34.3076	2.16712	40.0301	4.7	77	10.328	15.122	27.911	68.522	2906	1036			72	22.2222	1	1	122.25	67.5	85.75	65.1662	61.5875	24.5085	41.019	60.2054	0.666028	0.0588235	36.4518	2.37543	36.0988	69	3.2
50-59	0	67	20.679	1	0	0	121.5	66.5	84.8333	53.0005	85.1927	38.6276	50.5281	54.6585	0.593104	0.0735294	0	45.4047	2.40647	35.2522	14.4	24	8.495	27.827	124.812	68.261	3686	1096			69	21.2963	1	0	106.6	60.6	75.9333	52.0005	81.0876	36.0807	46.9568	55.5041	0.579087	0.0441176	46.3989	2.41277	31.4715	14	0.6
<40	0	96	29.6296	1	1	0	161.5	89.5	113.5	75.8336	97.0116	54.4297	52.1116	43.8936	0.537169	0.132353	0	47.2976	3.58675	31.6443	38.6	94	12.464	55.847	45.024	61.791	4742	1637			88	27.1605	1	1	118.25	63.25	81.5833	57.6668	106.554	56.9918	52.6142	46.5137	0.49378	0.0882353	47.4443	2.73596	29.8189	24	2
70-79	0	80	24.6914	1	1	1	129.75	62	84.5833	45.4995	78.6692	43.2537	47.6767	45.0182	0.60604	0.0588235	0	37.1231	1.68908	50.0764	5.1	77	19.923	22.97	74.298	75.081	223	680			75	23.1481	1	1	128.25	60.75	83.25	48.333	83.3798	35.7444	42.684	57.1307	0.511923	0.0294118	49.295	2.38258	34.9412	110	0.4
70-79	1	75	23.1481	1	1	1	133.4	60.2	84.6	71.8571	69.5814	40.873	35.961	41.2587	0.516819	0.294118	0	27.4721	1.97407	42.8557	17.9	707	12.249	27.485	26.051	61.106	7475	1831			72	22.2222	1	1	136	56	82.6667	63.2005	69.221	27.0977	34.8215	60.8533	0.503048	0.235294	43.8784	2.77314	29.8098	272	1.3
50-59	0	82	25.3086	1	1	0	137.6	80.8	99.7333	47.1426	97.2297	50.7179	51.1409	47.837	0.52598	0.205882	0.161765	47.5886	2.24345	44.4554	4.8	62	9.121		23.075	71.904	96	4557			89	27.4691	1	1	150.2	112.2	124.867	46.8569	91.9436	47.5567	40.5111	48.2762	0.440608	0.147059	46.6016	2.18361	57.1837	63	0.5
50-59	0	105	32.4074	1	1	1	169.75	89.25	116.083	67.167	91.2608	49.5521	58.4798	45.7028	0.640799	0.264706	0.0588235	41.6069	2.79461	41.5383	15.8	318	11.079	2.34	19.947	81.438	8961	2494			100	30.8642	1	1	128	63	84.6667	53.3334	104.051	50.7667	44.3307	51.2096	0.426049	0.117647	49.8913	2.66088	31.8191	115	1.3
40-49	0	64	19.7531	1	1	0	109	65.5	80	60.4995	108.176	64.9136	55.022	39.9924	0.508635	0.220588	0.102941	42.1669	2.55108	31.3593	49	222	10.537	29.481	31.339	48.258	786	4828			68	20.9877	1	1	134.5	75.75	95.3333	60.6673	115.116	65.9754	53.6746	42.6879	0.466265	0.205882	42.6124	2.58518	36.8769	60	5.3
60-69	0	96	29.6296	1	1	0	163.25	80	107.75	78.8338	99.4116	50.1851	56.9266	49.5179	0.572635	0.0882353	0	43.8178	3.45432	31.1928	12.7	136	8.264	9.28	23.711	94.54	1239	661			92	28.3951	1	1	184.4	86.2	118.933	56.5715	106.441	40.0324	44.9747	62.3899	0.422533	0.0735294	65.7416	3.7191	31.9791	48	2.1
60-69	0	84	25.9259	1	1	1	102	62	75.3333	49.8338	82.0126	52.771	39.0689	35.655	0.476377	0.308824	0	37.0463	1.84616	40.8054	16.3	588	11.964	156.614	26.248	60.29	571	2922			80	24.6914	1	1	120.75	63.5	82.5833	58.1669	90.5939	41.6752	41.8753	53.9977	0.462231	0.176471	51.8119	3.01374	27.4023	223	0.5
50-59	0	60	18.5185	1	1	0	131.75	73.75	93.0833	55.1673	80.3729	42.7643	53.7975	46.7926	0.669348	0.279412	0.147059	42.7239	2.35696	39.4929	2.4	184	12.784	6.028	19.512	81.599	96	4794			64	19.7531	1	1	125.8	77.2	93.4	61.9996	85.4402	41.4735	39.0194	51.459	0.456687	0.147059	43.0443	2.66873	34.9979	43	0.5
50-59	0	60	18.5185	1	1	1	126.4	76.8	93.3333	61.143	91.1394	57.4895	49.2899	36.9213	0.540818	0.25	0	39.1918	2.39631	38.9488	4.7	300	12.54	3.848	24.704	106.746	588	1846			60	18.5185	1	1	128.2	80.2	96.2	55.7144	89.0941	51.5863	41.231	42.0991	0.462781	0.220588	41.029	2.28591	42.084	67	1.6
60-69	0	68	20.9877	1	0	1	93.6	58.2	70	67.9998	104.523	75.0659	46.8334	28.1821	0.44807	0.470588	0.411765	30.6028	2.08099	33.6379	212.1	852	18.083	422.28	93.296	136.801	96	6147			72	22.2222	1	1	142.8	83.2	103.067	62.1422	134.357	99.3174	39.6037	26.0796	0.294764	0.470588	29.7406	1.84815	55.7676	133	3.5
50-59	0	70	21.6049	1	0	0	160.75	115.5	130.583	75.0005	102.088	63.0576	55.4407	38.2324	0.543065	0.323529	0	33.1404	2.48555	52.5371	22.5	298	9.602	4.869	13.891	62.09	96	4070			72	22.2222	1	0	134.8	77.8	96.8	59.8338	106.49	57.5218	49.653	45.9837	0.466271	0.235294	49.5424	2.9643	32.6552	331	0.6
60-69	0	102	31.4815	1	1	1	133.2	85.8	101.6	62.7146	76.4527	46.9633	59.6303	38.572	0.779963	0.294118	0.0294118	31.4395	1.97172	51.5287	4.8	107	8.987	43.697	15.042	59.285	96	3538			83	25.6173	1	1	114.5	55.5	75.1667	50.6669	108.756	50.4253	44.8287	53.6343	0.412196	0.264706	66.1697	3.35261	22.4203	99	0.2
50-59	0	87	26.8519	1	0	0	105.4	60.4	75.4	69.4287	106.383	66.6009	57.8039	37.395	0.543358	0.352941	0.0735294	40.4189	2.80623	26.8688	25.7	352	15.884	9.648	10.649	104.577	96	6279			83	25.6173	1	0	88.25	56.25	66.9167	54.1669	134.154	94.0527	43.6793	29.8919	0.325592	0.338235	45.2762	2.45247	27.2854	175	1
40-49	0	90	27.7778	1	1	1	113.667	65.3333	81.4444	55	95.2022	54.4335	57.4541	42.8233	0.603495	0.117647	0.0882353	44.1106	2.42608	33.5704	6.1	172	11.395	42.722	25.234	58.328	6337	1920			89	27.4691	1	1	118.6	62.4	81.1333	56.8337	105.127	43.2189	57.1835	58.8887	0.543949	0.117647	62.3768	3.5451	22.886	0	0
50-59	0	80	24.6914	1	1	1	121	78	92.3333	67.3325	68.9087	35.3546	41.0424	48.6936	0.595606	0.0588235	0	33.7587	2.27306	40.6207	17.9	205	9.652	11.363	11.471	79.606	181	800			80	24.6914	1	1	165.5	89.75	115	65.1667	71.5921	31.7753	32.655	55.6162	0.456126	0.0588235	38.5872	2.5146	45.7329	0	0
50-59	0	93	28.7037	1	1	0	111.5	61.25	78	56.1668	95.7006	55.3102	55.2228	42.2049	0.577038	0.117647	0.0294118	40.0132	2.24741	34.7065	12.6	70	13.328	37.936	25.668	52.975	33	1483			100	30.8642	1	1	104.75	57	72.9167	47.4997	89.4118	43.586	43.0936	51.2525	0.481968	0.0147059	49.6757	2.35958	30.9024	19	1.8
50-59	0	85	26.2346	1	1	1	170.75	106.25	127.75	83.8338	97.6788	61.9322	41.3732	36.596	0.423564	0.176471	0	34.8292	2.91987	43.752	20.6	331	12.464	10.052	15.454	60.958	532	1883			85	26.2346	1	1	121.75	70.75	87.75	60.8331	92.0522	48.0496	38.582	47.8018	0.419131	0.102941	48.5647	2.95434	29.7021	58	0.7
40-49	0	80	24.6914	1	1	0	149.2	87.2	107.867	73.1434	83.2243	47.4365	75.9362	43.0016	0.912428	0	0	31.1109	2.27556	47.4023	5.5	69	9.387	79.49	32.294	69.706	55	3118			85	26.2346	0	0	151.5	79.75	103.667	49.3336	99.4177	47.4996	68.9932	52.2222	0.693973	0	49.9735	2.46538	42.049	212	0.7
70-79	0	70	21.6049	1	1	1	122.75	71	88.25	53.6666	81.8175	48.0297	59.1732	41.2965	0.723234	0.323529	0	31.8226	1.70781	51.6744	12	113	10.881	6.005	29.89	79.254	54	2786			78	24.0741	1	1	128.5	70.6667	89.9444	49.0006	81.6539	41.7395	45.6134	48.8824	0.558618	0.191176	41.5054	2.03379	44.2251	129	0.6
50-59	0	110	33.9506	1	1	1	167.5	85.5	112.833	77.1676	143.448	114.245		20.3581		0.161765	0.0441176	28.5417	2.20249	51.2298	120.5	247	21.864	16.272	77.076	166.982	100	3582			104	32.0988	1	1	176.25	82.5	113.75	57.3331	148.079	94.6427		36.0865	0	0.176471	56.0384	3.21286	35.4046	146	4.1
40-49	0	75	23.1481	1	1	0	145	81	102.333	59.3337	103.752	53.3115	47.1855	48.6165	0.45479	0.117647	0	55.3079	3.28162	31.1838	7.6	50	11.908	6.784	47.333	99.697	464	1841			81	25	1	1	127.5	74.75	92.3333	53.5003	107.499	49.2158	44.3956	54.2175	0.412985	0.0735294	61.8366	3.30828	27.9098	30	1.6
50-59	0	71	21.9136	0	1	0	150.5	89	109.5	100.835	91.0184	64.4873	53.7831	29.1492	0.590904	0.397059	0.205882	25.6682	2.58824	42.3067	40.7	283	11.704	5.053	29.648	59.043	100	4692			73	22.5309	0	0	129.75	71.75	91.0833	53.0003	113.386	65.8652	46.7504	41.9105	0.412312	0.323529	45.7809	2.4264	37.5384	113	2.6
70-79	0	80	24.6914	1	1	1	121.75	77.5	92.25	55.5002	82.4919	44.959	54.4585	45.4989	0.660167	0.25	0.102941	36.5563	2.02888	45.4684	59.8	118	11.704	15.009	42.224	64.171	10	2555			81	25	0	0	142	85.75	104.5	45.833	91.9096	44.175	48.5342	51.9365	0.528065	0.132353	43.3341	1.98613	52.6149	157	2.9
<40	0	90	27.7778	1	1	1	126.75	75	92.25	52.8333	107.633	58.8084	62.5754	45.3619	0.581379	0.323529	0	47.7185	2.52112	36.5908			6.671	14.434	34.39	51.876		3138			95	29.321	0	0	122.75	64.75	84.0833	49.6666	99.912	54.1182	55.1633	45.8341	0.552119	0.264706	47.7855	2.37335	35.4282	46	2.7
50-59	0	79	24.3827	1	1	0	135	73.75	94.1667	56.1671	92.3409	40.9047	48.5005	55.7025	0.525233	0.0735294	0	51.8365	2.91151	32.3429	1.6	134	13.158	21.032	50.97	147.914	21	1010			73	22.5309	1	1	133.5	74	93.8333	58.333	93.1858	32.8771	44.1003	64.7187	0.473252	0.0441176	63.1841	3.68572	25.4586	116	0.5
<40	0	88	27.1605	0	1	0	138	81	100	70.1425	93.5247	57.655	49.9397	38.3532	0.533973	0.176471	0.0588235	36.0892	2.53139	39.504	19.8	78	11.83	19.411	20.876	63.415	95	5000			83	25.6173	0	1	119.5	60	79.8333	53.4998	112.229	57.9852	45.0293	48.3333	0.401226	0.132353	59.2557	3.17017	25.1827	44	0.5
80-89	1	70	21.6049	0	1	0	134	61	85.3333	86.6685	54.5899	30.9107	47.095	43.3766	0.862705	0.205882	0	23.4216	2.02992	42.0379	95.6	408	17.218	132.99	58.568	64.767	95	3143			68	20.9877	1	1	169.25	69	102.417	53.6669	62.8764	30.9602	34.6959	50.7603	0.551812	0.147059	38.3609	2.05871	49.748	335	2.2
50-59	0	57	17.5926	1	1	0	96.75	60	72.25	68.3329	106.252	75.1906	55.052	29.2336	0.518128	0.323529	0	31.6951	2.16582	33.3592	50	801	11.499	18.623	13.922	63.543	13	187			60	18.5185	1	1	105.75	59	74.5833	65.166	101.654	58.9395	51.7273	42.0198	0.508854	0.264706	45.7448	2.98101	25.0195	190	2
50-59	0	90	27.7778	1	1	0	97	60.5	72.6667	81.6662	86.1162	52.7313	47.6213	38.7672	0.552989	0.338235	0.117647	25.4558	2.07888	34.9547	103.8	443	16.365	174.919	24.234	82.634	95	4896			90	27.7778	1	1	121.25	65.5	84.0833	54.9999	83.5093	48.4557	36.7554	41.9757	0.440135	0.279412	35.8267	1.97047	42.6718	69	2.2
60-69	0	75	23.1481	1	1	1	124.25	72.75	89.9167	47.5001	95.6365	46.2542	55.717	51.6355	0.582592	0.102941	0	48.5677	2.30697	38.9761	10	136	22.428	64.999	33.114	94.605	34	1052			75	23.1481	1	1	132.25	77.25	95.5833	43.3335	100.091	37.5903	48.8392	62.4439	0.487947	0.0735294	62.1457	2.69299	35.4934	49	1.5
50-59	0	90	27.7778	1	1	0	127	79.25	95.1667	51.1672	100.614	64.6236	57.304	35.771	0.569541	0.205882	0	40.1597	2.05486	46.313	5.3	144	12.578	8.231	25.745	75.879	95	2533			92	28.3951	1	1	149	76.75	100.833	53.1666	99.9687	50.1286	46.9887	49.8557	0.470035	0.117647	54.8525	2.91632	34.5756	38	0.2
<40	0	92	28.3951	1	1	0	105.5	64.25	78	69	111.836	65.1614	55.4055	41.7347	0.495419	0.338235	0.0588235	40.3405	2.78349	28.0223	6.9	190	11.099	41.934	23.194	60.702	95	5183			95	29.321	1	1	110.75	54.25	73.0833	47.9999	106.921	57.8449	38.808	45.8997	0.362958	0.205882	51.3891	2.46667	29.6283	70	1.1
60-69	0	80	24.6914	1	1	1	139.75	89.75	106.417	61.9987	55.97	40.265	51.535	28.0597	0.920761	0.25	0	15.5	0.960979	110.738	9.4	355	15.922	4.51	24.84	72.401	865	2746			79.5	24.537	1	1	130	72.25	91.5	60.6664	66.1019	35.456	43.4711	46.3616	0.657637	0.102941	31.0973	1.88656	48.5009	78	0.6
60-69	0	64	19.7531	1	1	0	111.75	67	81.9167	63.3326	75.7599	39.2328	39.1977	48.2143	0.517393	0.117647	0	40.41	2.55927	32.0079	18	157	12.531	6.548	30.716	86.925	102	545			62	19.1358	1	1	117.75	65.5	82.9167	52.6662	79.7211	35.6359	30.8757	55.2993	0.387297	0.0294118	45.2217	2.38166	34.8147	41	1.9
50-59	0	90	27.7778	1	1	0	119	72	87.6667	60.7147	92.5365	49.7755	63.5767	46.2099	0.687045	0.279412	0.0294118	44.584	2.7069	32.3864	16.5	163	9.853	17.532	13.982	69.945	47	2239			90	27.7778	1	1	135.5	65	88.5	69.8327	80.5283	37.1634	49.0047	53.8504	0.60854	0.117647	36.7709	2.56781	34.4651	14	3.6
60-69	0	96	29.6296	1	0	0	110.75	68.5	82.5833	72.6672	93.6459	63.0273	54.3693	32.6962	0.580584	0.397059	0.205882	32.9739	2.39612	34.4654	26.8	134	11.068	97.304	138.874	58.132	94	4678			92	28.3951	1	1	158.75	88.75	112.083	56.0001	117.227	73.8334	39.4429	37.0167	0.336467	0.323529	48.5999	2.7216	41.1829	80	0.6
50-59	1	70	21.6049	0	0	0	86	46.75	59.8333	50.3328	81.0373	41.6433	30.1965	48.6122	0.372625	0.161765	0	42.353	2.13174	28.0678	119.3	238	17.18	7.724	19.313	76.421	24	1383			68	20.9877	1	1	101.25	53.25	69.25	58.0004	77.8187	32.6756	25.1963	58.0106	0.323782	0.0882353	48.1976	2.79548	24.7721	47	3.7
50-59	0	63	19.4444	0	1	0	139	82.2	101.133	64.571	85.9195	42.9598	62.9684	50	0.732877	0.0882353	0	49.4332	3.19195	31.6839	1.3	38	12.182	9.054	35.759	75.456	26	1087			72	22.2222	0	1	124.75	69.5	87.9167	60.1668	91.3745	42.3761	36.7722	53.6237	0.402434	0.102941	51.7453	3.11335	28.2386	14	0.6
50-59	0	62	19.1358	1	1	1	168	92.8	117.867	56.7148	118.617	72.8211	53.6504	38.6082	0.452299	0.147059	0	47.1508	2.67415	44.0764	4.3	357	11.196		57.496	70.11	7244	243			62	19.1358	1	1	147.5	69	95.1667	64.8338	114.391	58.7176	55.9005	48.6695	0.488678	0.117647	54.3129	3.52131	27.0259	127	0.4
50-59	0	72	22.2222	1	1	1	98.5	60.75	73.3333	54.8329	115.842	70.9525	48.2086	38.7505	0.416159	0.235294	0.132353	44.8999	2.46199	29.7862	9.8	174	9.543	25.789	22.773	96.719	940	5167			79	24.3827	1	1	115	62.75	80.1667	49.8337	122.55	74.0647	43.5478	39.5636	0.355348	0.220588	47.2174	2.35302	34.0697	208	0.5
40-49	0	80	24.6914	1	1	1	166.25	98.75	121.25	69.167	92.8922	56.5276	57.8602	39.1471	0.622875	0.235294	0.0147059	38.0727	2.63337	46.0436	23.2	70	19.497	21.278	37.767	162.477	781	3044			78	24.0741	1	1	140	72	94.6667	54.9997	87.0883	44.5185	48.442	48.8812	0.55624	0.191176	42.7261	2.34992	40.285	82	6.1
40-49	1	52	16.0494	1	1	0	120.75	71	87.5833	59.1664	92.6825	58.2306	43.942	37.1719	0.474113	0.191176	0.0882353	36.7575	2.17481	40.2717	7.9	92	6.792	12.952	29.715	71.585		2665			58	17.9012	1	1	103.25	54.75	70.9167	52.6667	93.7377	46.7075	34.45	50.1721	0.367515	0.117647	47.4605	2.49959	28.3713	65	0.6
<40	0	61	18.8272	1	0	0	97.6667	54.3333	68.7778	72.2006	112.562	73.9483	54.9374	34.3042	0.488065	0.411765	0.132353	39.9934	2.88755	23.8188	0.6	165	10.633	17.389	24.028	93.989	94	4354			63	19.4444	1	1	105.75	59	74.5833	59.6671	142.975	93.8386	51.6085	34.3671	0.360961	0.323529	54.8731	3.27412	22.7797	165	0.6
50-59	0	104	32.0988	0	1	1	132.667	69	90.2222	52.2003	82.1879	45.1323	50.1335	45.0864	0.609986	0.338235	0.0588235	36.234	1.89142	47.7007	2.5	388	12.17	52.22	98.065	109.787	9301	2365			99	30.5556	0	1	126	67	86.6667	57.4995	83.2203	38.7595	45.0492	53.4255	0.541325	0.117647	45.0225	2.58877	33.4779	46	1.7
70-79	1	60	18.5185	1	1	1	149.5	83	105.167	91.3346	65.0481	35.4238	39.8953	45.5421	0.61332	0.294118	0	28.4605	2.59943	40.4576	26.4	133	19.203	72.351	22.165	67.955	667	1235			69	21.2963	1	1	146.75	70	95.5833	59.6674	74.6522	41.4741	31.4732	44.4436	0.421598	0.220588	32.809	1.95763	48.8261	74	3.9
70-79	0	68	20.9877	0	0	0	183.75	114.333	137.472	78.1672	108.972	69.9499	65.6829	35.8096	0.602748	0.147059	0.0882353	38.9403	3.04385	45.1639	83.5	194	12.954	2.21	737.4	126.252	20	576			75	23.1481	1	0	161.6	78	105.867	79.8572	105.93	58.0729	60.9369	45.1782	0.575255	0.220588	46.9243	3.74725	28.2519	105	15.1
40-49	0	68	20.9877	0	0	0	105.75	57.75	73.75	48.833	111.966	61.4726	54.7724	45.0971	0.489188	0.0882353	0.0147059	52.9257	2.58452	28.5353	1.1	96	16.454	3.056	23.894	70.11	24	1335			75	23.1481	0	0	117.25	74	88.4167	57.8335	97.2705	48.7509	44.5673	49.8811	0.458179	0.0735294	52.6978	3.0477	29.011	23	0.6
60-69	0	84	25.9259	1	0	0	123	74.25	90.5	61.0004	76.9196	38.1114	38.2831	50.4529	0.497703	0.0735294	0	33.8572	2.0653	43.8193	3.3	225	12.289		9.749	116.605	182	726			82	25.3086	1	0	103.75	63	76.5833	54.5006	59.71	26.8976	36.8848	54.953	0.617733	0.0147059	27.8114	1.51574	50.5255	13	0.5
50-59	0	95	29.321	1	0	0	126	71.75	89.8333	59.8333	86.49	44.8337	49.5311	48.1632	0.57268	0.117647	0.0588235	43.0911	2.57828	34.8423	20.1	236	12.696	8.078	25.782	100.678	565	1813			97	29.9383	1	1	127.25	73.75	91.5833	62.9999	87.5636	41.4881	45.5914	52.6194	0.520666	0.117647	47.9414	3.02031	30.3225	12	5.5
50-59	0	84	25.9259	1	1	0	108	59	75.3333	66.8335	94.8641	52.1321	51.3293	45.0455	0.541082	0.205882	0	38.1082	2.54691	29.5784	4.8	65	18.137	5.229	10.459	130.236	94	3110			92	28.3951	1	1	107.75	57.25	74.0833	76.4997	69.7654	39.8841	42.0317	42.8312	0.602471	0.117647	32.141	2.45878	30.1302	10	1.9
40-49	0	70	21.6049	0	1	0	111.25	66.75	81.5833	69.6671	99.744	62.2764	58.4925	37.5637	0.586426	0.397059	0.0441176	37.73	2.62854	31.0375	12.3	222	9.626	10.997	14.181	68.66	10	5019			68	20.9877	0	1	104.5	60.25	75	66.3338	122.649	71.2745	49.6209	41.8872	0.404578	0.308824	52.1507	3.45936	21.6803	49	0.3
40-49	0	65	20.0617	1	1	0	120.5	59.75	80	58.0005	94.0799	46.4431	42.5273	50.6344	0.452034	0.0588235	0	50.7605	2.94414	27.1727	8.6	#NULL!	21.465	84.384	29.031	118.347	95	558			63	19.4444	1	1	151	70	97	50.0001	108.508	42.3981	36.6472	60.9263	0.337737	0.0588235	70.2575	3.51288	27.6126	17	0.8
50-59	0	79	24.3827	1	1	0	146	93.75	111.167	65.6666	82.6265	43.8953	53.0806	46.875	0.642416	0.205882	0.0294118	40.3131	2.64722	41.9937	10	247	16.592	2.527	18.803	67.889	35	1201			72	22.2222	1	1	133.75	75.5	94.9167	63.8334	79.6385	29.2758	44.6754	63.2391	0.560977	0.0882353	56.6594	3.61676	26.2435	10	0.7
60-69	0	80	24.6914	1	1	0	152	84.25	106.833	56.5005	79.2927	37.0985	53.5348	53.2132	0.675154	0.161765	0.0147059	40.6838	2.29866	46.4764	14.1	70	10.023	10.383	6.879	73.354	64	1741			73	22.5309	1	1	134	72.25	92.8333	48.3332	102.542	46.6903	55.2008	54.4674	0.538321	0.0735294	63.0012	3.04505	30.4866	133	0.4
60-69	0	79	24.3827	1	1	1	139	74.5	95.9167	92.6651	94.0597	68.263	52.0212	27.4259	0.553065	0.411765	0.220588	24.6546	2.28462	41.9837	30.1	117	23.068	25.761	53.559	74.613	10	6022			76	23.4568	1	1	106.75	64.75	78.75	55.6668	120.07	76.0199	43.8657	36.6872	0.365334	0.338235	45.143	2.51297	31.3374	129	13.8
70-79	0	80	24.6914	1	1	1	109	72.5	84.5833	70.8336	137.484	109.918	88.6791	20.0505	0.645014	0.235294	0.191176	27.2737	1.93189	43.7827	3.9	661	13.452	2.198	15.733	87.688	100	2291			80	24.6914	1	1	127.75	88.75	101.75	89.1672	141.094	118.878	68.9726	15.7453	0.488841	0.235294	29.2572	2.60878	39.0029	546	30.9
40-49	0	84	25.9259	1	1	0	116	70.25	85.4167	62.6673	115.007	73.8048	57.6559	35.8258	0.501325	0.352941	0.0294118	37.2629	2.33516	36.5784	30.8	189	10.502	9.967	28.495	72.002	74	3097			82	25.3086	1	1	117.25	65	82.4167	46.3331	114.079	62.3173	42.8379	45.3737	0.37551	0.161765	54.3678	2.51903	32.7176	59	1
50-59	0	117	36.1111	1	0	1	140	65.75	90.6667	58.8331	89.5015	57.4627	51.6428	35.797	0.577005	0.323529	0.147059	32.1446	1.89116	47.9422	12.9	139	23.602	266.435	42.998	107.428	100	2455			109	33.642	0	0	134.75	90.5	105.25	64.1667	90.6726	53.1538	53.8155	41.3783	0.593514	0.205882	37.2471	2.39003	44.0372	41	3.2
60-69	0	75	23.1481	1	1	1	122	68	85.8333	65.6669	81.9557	40.3695	51.5417	50.7423	0.628896	0.0294118	0	40.5591	2.66339	32.2271	15.9	82	8.014	12.6	22.949	36.25	17	764			72	22.2222	1	1	152	78.25	102.833	66.1669	82.8178	34.0357	32.0573	58.903	0.387082	0	52.6851	3.48601	29.4989	12	0.4
40-49	0	69	21.2963	1	1	0	126	75	91.9167	67.8326	94.8442	48.6724	51.1787	48.6817	0.539609	0.147059	0	46.9582	3.18529	28.8566	9.5	309	9.125	9.578	12.596	81.296	69	2484			68	20.9877	1	1	114.75	64	80.9167	55.3337	89.9053	40.7709	47.9053	54.6512	0.532842	0.0735294	54.3079	3.00506	26.9268	16	7.5
70-79	0	98	30.2469	1	1	1	170	81.25	110.917	80.6661	100.072	71.5512	67.7301	28.5001	0.676815	0.455882	0.220588	27.4897	2.21749	50.019	112.5	364	16.492	139.463	27.535	71.43	100	7045			92	28.3951	1	1	142	70.25	94.1667	64.8338	95.2258	54.7768	54.7863	42.4769	0.57533	0.367647	38.775	2.51393	37.4579	212	1.6
60-69	0	85	26.2346	1	1	0	113	66.6667	82.2222	59.2005	104.588	73.2286	56.9006	29.9839	0.544044	0.352941	0.294118	32.1612	1.90396	43.1849	82.3	200	10.412	23.622	10.645	46.585	100	6089			90	27.7778	1	1	116.75	69.5	85.25	52.8336	98.5063	59.1201	45.6949	39.9834	0.463878	0.352941	44.2379	2.33725	36.4745	50	1
70-79	0	73	22.5309	1	1	0	139	80.5	99.9167	62.8325	64.3295	29.7465	41.6473	53.7591	0.647407	0.0147059	0	39.1259	2.45838	40.6433	2.5	60	11.569		15.314	60.963	369	525			72	22.2222	1	1	102.5	59	73.5	58.333	60.0033	23.4738	36.5896	60.8791	0.609794	0.0147059	31.7362	1.85127	39.7025	25	0.3
80-89	0	80	24.6914	1	1	1	106	62.75	77	55.1661	87.3048	54.4131	55.3083	37.6746	0.633508	0.279412	0.0147059	31.8987	1.75973	43.7568	58.4	352	24.06	177.338	19.48	146.243	35	1963			80	24.6914	1	1	152.5	78.25	103	53.3334	111.676	65.0889	62.6604	41.7166	0.561089	0.264706	42.1887	2.25006	45.7765	441	1.3
70-79	0	94	29.0123	1	0	0	140	99.25	112.833	97.4998	95.2237	69.4251	51.8785	27.0926	0.544807	0.426471	0.235294	26.2921	2.56348	44.0157	132.5	327	11.502	3.087	8.665	31.209	10	3332			93	28.7037	1	0	133.25	75	94.4167	61.1664	95.3633	56.7663	44.2175	40.4736	0.463674	0.338235	43.5915	2.66633	35.4107	59	2.2
70-79	1	58	17.9012	0	0	0	157	86	109.667	75.6674	79.4176	50.7447	45.6389	36.104	0.57467	0.382353	0.205882	30.034	2.2726	48.2561	45.6	550	13.503		12.657	63.514	100	4794			57	17.5926	0	0	150	62.5	91.6667	60.3325	88.3815	51.6291	34.451	41.5838	0.389799	0.308824	39.8314	2.40313	38.1447	466	6.5
50-59	0	75	23.1481	1	1	0	103	58.5	73.25	59.5	108.753	54.4128	58.3168	49.9668	0.53623	0.235294	0	45.443	2.70386	27.0909	1.5	66	13.426	4.687	13.211	75.413	52	2357			74	22.8395	1	1	119.75	67.75	85.0833	51.9997	117.331	60.004	54.1086	48.8591	0.461164	0.161765	56.6664	2.94664	28.8747		0.9
40-49	0	50	15.4321	1	1	0	98	59	71.9167	57.1668	110.667	61.3892	58.4606	44.5281	0.528256	0.411765	0.0294118	50.1109	2.86468	25.1046	11.5	81	8.081		9.127	72.562	100	3418			60	18.5185	1	1	109	58.25	75.1667	56.8335	103.08	62.3674	44.4735	39.4963	0.431445	0.25	47.5271	2.70113	27.8278	43	1.3
70-79	0	83	25.6173	0	0	0	122	72.5	89.0833	74.9993	83.0695	50.9629	52.2471	38.6503	0.628957	0.411765	0.411765	28.0296	2.1022	42.3763	33.5	405	17.544	9.704	20.632	60.043	100	7568			81	25	0	0	164.5	78.25	107	61.9997	117.105	86.1523	41.5027	26.4317	0.354405	0.411765	25.2782	1.56724	68.2728	463	1.1
50-59	0	87	26.8519	1	1	0	123	72.25	89.25	60.3333	91.2502	48.9752	72.2841	46.3287	0.792153	0.191176	0.147059	39.6144	2.39007	37.342	43.4	61	10.281	86.444	17.005	52.039	100	3274			84	25.9259	1	1	150	83.25	105.5	52.6667	108.444	58.4676	53.6546	46.085	0.494768	0.235294	53.2565	2.80484	37.6135	23	1.1
50-59	0	86	26.5432	1	1	0	112	67.25	82.0833	69.6663	104.629	60.0924	66.2643	42.5663	0.633326	0.279412	0.176471	39.8497	2.77618	29.567	11.6	152	11.441	5.652	16.142	91.27	97	5688			93	28.7037	1	1	129	81	97	64.2	101.664	55.6276	53.6369	45.2831	0.527589	0.264706	48.6191	3.12134	31.0763	44	0.4
50-59	0	92	28.3951	1	1	0	127	84.5	98.75	58.8333	81.597	39.4473	57.5108	51.6559	0.704815	0.117647	0.0588235	37.8148	2.22477	44.3866	12.1	18	22.994	81.381	147.04	75.865	467	1926			92	28.3951	1	1	163	89	113.667	58.1666	86.7943	40.5126	52.2629	53.3234	0.602147	0.117647	45.6545	2.65557	42.8032	12	0.8
40-49	0	115	35.4938	1	1	0	149	103.25	118.5	61.3329	86.5637	46.553	47.6781	46.2211	0.550787	0.132353	0	42.5515	2.60981	45.4057	4.7	38	14.015		18.849	53.311	137	909			111	34.2593	1	1	181	104.5	130	55.8333	79.2474	30.8594	43.6196	61.0594	0.550423	0.0588235	49.1418	2.74375	47.3805	25	1.2
40-49	0	78	24.0741	0	1	0	111	69.75	84.0833	60.8331	92.1511	44.1278	53.4158	52.1136	0.579654	0.220588	0	52.4483	3.19059	26.3535	4.6	63	14.186	10.596	22.165	65.724	396	1199			78	24.0741	1	1	124.5	72.25	89.6667	43.5002	94.6564	47.1831	50.1925	50.1533	0.53026	0.0735294	47.8654	2.08215	43.0644	11	0.5
40-49	0	86	26.5432	1	1	0	111	61.75	78.1667	74.9997	113.153	82.5913	58.5026	27.0092	0.517022	0.279412	0.0588235	31.74	2.38049	32.8364	14	130	14.534	12.634	15.499	57.311	75	3138			92	28.3951	1	1	122.25	65.25	84.25	57.4999	86.2645	57.7949	48.3282	33.0027	0.560233	0.176471	28.8277	1.65759	50.8268	32	2
50-59	1	58	17.9012	0	1	0	122	67.75	85.75	61.1661	94.4837	57.0337	41.1975	39.6365	0.436027	0.132353	0	35.5732	2.17588	39.4094	0.8	150	11.689	4.966	12.11	55.234	126	572			66	20.3704	0	1	121.75	64.75	83.75	57.8331	83.7946	40.8049	28.0178	51.3037	0.334363	0.0588235	40.2472	2.32762	35.981	72	0.2
50-59	0	62	19.1358	0	1	0	108	62.75	77.75	64.0005	84.755	46.0191	46.5546	45.7035	0.549284	0.117647	0.0441176	51.767	3.31311	23.4674	22.1	157	8.815		8.148	58.271	5681	3642			69	21.2963	0	1	116	72.75	87.1667	57.4996	99.7267	50.8506	42.0077	49.01	0.421229	0.0882353	49.787	2.86273	30.4488	69	1
61-69	0	73	22.5309	0	1	0	143	76.25	98.5833	54.8332	110.356	49.6223	70.9893	55.0342	0.643277	0.102941	0	59.1182	3.24164	30.4115	5.5	241	14.836	3.087	19.073	67.062	33	250			72	22.2222	0	1	136	74.75	95.1667	48.0001	107.453	46.627	61.7589	56.6071	0.574752	0.0588235	50.6352	2.4305	39.1553	44	6.6
50-59	0	73	22.5309	1	1	0	124	79.5	94.1667	73.3329	98.6639	59.3904	61.1129	39.8053	0.619405	0.25	0.176471	31.8405	2.33496	40.3291	15.9	90	10.329	3.175	17.655	80.041	97	4281			74	22.8395	1	1	111.25	70.75	84.25	66.1671	86.0917	46.452	46.8875	46.0436	0.544622	0.220588	36.809	2.43555	34.5918	25	2.5
60-69	0	92	28.3951	1	1	0	150	84.75	106.333	53.6667	94.7166	43.6743	47.5044	53.8895	0.501542	0.0294118	0	49.6141	2.66263	39.9355	8.7	161	12.366		18.067	54.407	392	236			92	28.3951	1	1	125.25	70.5	88.75	47.3332	85.9576	34.6418	39.9278	59.699	0.464505	0.0294118	53.7873	2.54593	34.8596	57	2.4
50-59	0	80	24.6914	1	1	0	138	84.25	102	75.8	87.2739	38.9731	44.9361	55.344	0.514885	0.0147059	0	37.5582	2.84691	35.8283	2.1	39	13.753		45.378	40.802	13	464			78	24.0741	1	1	115.5	68.5	84.1667	64.666	80.7628	29.4341	43.9193	63.5548	0.543806	0.0147059	41.163	2.66184	31.6197	32	0.3
60-69	0	116	35.8025	1	1	0	124	77	92.5	59.3336	114.397	74.0678	51.4142	35.254	0.449435	0.264706	0.220588	42.301	2.50987	36.8545		300	14.911	31.45	19.458	66.016	95	6935			114	35.1852	1	1	140.75	76.75	98.0833	57.6665	112.268	72.7331	53.5928	35.2145	0.477367	0.294118	46.2366	2.6663	36.7862	139	0.6
60-69	0	75	23.1481	1	1	0	127	90.5	102.667	54.6663	104.442	57.5781	72.1056	44.8709	0.690387	0.205882	0.0294118	44.2463	2.41878	42.4456	9.3	177	9.024		57.028	45.696	95	2717			81	25	1	1	128.5	77	94.1667	50.6668	98.9994	45.0647	58.8157	54.4798	0.594102	0.117647	48.6583	2.46536	38.1959	56	0.7
40-49	0	95	29.321	1	1	1	128	79	95.1667	82.8342	84.4509	48.2577	72.8505	42.8571	0.862637	0.220588	0	36.1933	2.99804	31.743	44.4	274	11.158	21.258	20.204	46.196	836	3528			99	30.5556	1	1	129.25	71.75	90.9167	59.3338	88.6364	41.3636	49.4409	53.3333	0.557795	0.0882353	44.0909	2.61608	34.753	61
60-69	1	74	22.8395	1	1	0	139	76.5	97.4167	62.333	80.6158	45.3382	64.2641	43.7602	0.797165	0.352941	0.132353	35.1256	2.18948	44.493	18.5	129	10.536	9.384	13.065	55.155	95	3989			76	23.4568	1	1	196	102.5	133.667	59.8334	102.86	44.2161	62.7523	57.0132	0.610077	0.294118	58.104	3.47656	38.448	136	4.2
40-49	1	55	16.9753	1	1	0	117	73.5	88	77.6665	80.7434	47.7463	46.6014	40.8666	0.577155	0.308824	0.0147059	32.6197	2.53346	34.7351	2.8	77	13.638	17.247	19.661	75.413	2104	839			55	16.9753	1	1	115.25	57.25	76.5833	63.3327	74.309	32.0697	35.0374	56.8428	0.47151	0.0588235	42.8533	2.71402	28.2177	35	1.2
50-59	0	71	21.9136	1	1	1	168	113.25	131.333	68.4994	90.9947	54.8481	49.9385	39.7239	0.548807	0.323529	0.235294	35.265	2.41563	54.3681	10.2	186	12.889	6.331	22.547	60.448	59	1453			68	21.142	1	1	151.75	96	114.583	56.5005	93.0049	54.9985	48.3509	40.8649	0.519875	0.235294	31.4149	1.77496	64.5556	73	1
50-59	1	63	19.4444	1	1	0	110	60.25	76.8333	70.4	73.6022	43.4374	63.9495	40.9836	0.868852	0.294118	0.132353	31.3714	2.20855	34.789	27.9	152					97	3956			62	19.1358	1	1	111.5	57.75	75.6667	57.75	76.0179	42.57		44	0	0.235294	38.9211	2.2477	33.6641	39	0.7
60-69	0	77	23.7654	1	1	0	119	73.5	88.6667	72.334	110.488	69.812	61.3896	36.8148	0.555622	0.426471	0.0735294	44.463	3.21618	27.5689	46.4	307	12.257	36.56	13.959	76.038	100	3400			70	21.6049	1	1	105.75	65.5	78.9167	51.8333	124.017	65.994	59.594	46.7865	0.480529	0.352941	62.7136	3.25065	24.2772	122	0.6
50-59	0	83	25.6173	1	1	0	120	72.25	88.3333	51.4997	88.8875	49.6621	64.9842	44.1293	0.731083	0.102941	0	40.1409	2.06724	42.73	8	107	15.824	4.509	27.5	89.775	43				82	25.3086	1	1	125	71.3333	89.2222	48.8004	90.7823	38.4001	48.191	57.7009	0.530841	0.0441176	54.1749	2.64375	33.7483	22	0.8
40-49	0	75	23.1481	1	1	0	104	62.5	76.5	56.8329	98.3957	55.0405	56.451	44.0621	0.573714	0.352941	0	38.0355	2.16167	35.3894	3.6	40	9.369	11.61	20.071	42.782	86	3304			77	23.7654	1	1	132	72.25	92.1667	52	106.499	51.8602	47.074	51.3046	0.442013	0.191176	48.4869	2.52132	36.5549	20	0.3
40-49	0	90	27.7778	1	1	0	148	79.25	102	62.6666	92.5384	57.241	45.0533	38.1435	0.48686	0.176471	0	35.5534	2.22801	45.7808	10.3	57	12.646	6.694	21.31	100.152	176	1049			90	27.7778	1	1	172.75	111.5	131.917	88.6675	86.665	57.7056	46.5939	33.4154	0.537633	0.0294118	27.9687	2.47991	53.1941	10	9.1
60-69	0	80	24.6914	0	1	0	179	81.5	113.917	56.6666	79.5172	39.3352	52.266	50.5325	0.657292	0.0882353	0	36.0036	2.0402	55.836	2.8	49	6.511		33.526	94.908	23	998			75	23.1481	0	1	126.25	65.5	85.75	44.8337	85.2269	35.4739	47.5814	58.3771	0.558292	0.0735294	51.5548	2.31139	37.0989	20	0.6
40-49	0	68	20.9877	0	1	1	138	80.5	99.5833	62.3327	79.0886	40.0443	70.6855	49.3678	0.89375	0.102941	0.0882353	37.4989	2.33741	42.6042	13.6	37	11.67	19.858	22.074	117.866	86				64	19.7531	0	1	142	69.5	93.6667	47.4999	96.5798	50.366	51.0688	47.8503	0.528773	0.117647	45.0952	2.14202	43.7283	23	1.4
60-69	1	60	18.5185	1	1	1	105	60	74.9167	52.6662	89.2006	50.8919	41.0442	42.9467	0.460133	0.0294118	0	37.2746	1.96311	38.1622	9.9	339	9.757	3.413	16.929	58.831	138	563			56	17.284	1	1	108.25	62.75	77.9167	51.6667	81.2855	30.5614	33.5733	62.4024	0.41303	0.0588235	47.9175	2.47574	31.4721	43	0.4
50-59	0	97	29.9383	1	1	1	132	81.75	98.4167	85.5001	65.2977	37.7562	55.1599	42.1784	0.844744	0.220588	0	26.6429	2.27797	43.2036	18.8	49	13.002	26.443	43.29	75.195	51	1291			92	28.3951	1	1	117	78.5	91.3333	53.1664	78.0055	42.5801	43.5213	45.414	0.557927	0.117647	34.7763	1.84893	49.398	29	0.4
50-59	0	85	26.2346	1	0	1	139	80.5	99.9167	72.333	91.9455	59.0276	56.1376	35.8015	0.610553	0.132353	0	32.9429	2.38286	41.9315	19.3	75	10.567	10.133	12.268	78.871	9287	3231			85	26.2346	1	0	117.75	68	84.5833	62.3332	80.6401	41.0987		49.0344	0	0.132353	40.4299	2.52012	33.5632	19	0.6
60-69	0	84	25.9259	1	1	0	170	124.5	139.833	81.6662	113.826	91.2521	67.5109	19.8316	0.593109	0.352941	0.117647	20.4372	1.66903	83.7812	11.7	257	15.192	14.61	19.162	102.661	100	4000			81	25	1	1	117.25	69.25	85.25	59.833	143.287	88.4718	52.1347	38.2556	0.363847	0.352941	53.0216	3.17244	26.872	133	0.5
60-69	0	78	24.0741	1	1	0	141	75.5	97.3333	55.1663	109.378	55.3673	80.3574	49.3797	0.734679	0.279412	0.0588235	46.0882	2.54252	38.2823	52.2	99	11.74	25.159	11.393	61.339	94	4532			83	25.6173	1	1	129.5	66.75	87.6667	49.0001	100.338	61.5421	44.9962	38.6651	0.448446	0.220588	44.1821	2.16492	40.4941	36	2.1
50-59	0	80	24.6914	1	1	0	107	68.25	81.0833	53.1669	103.774	61.3433	60.1857	40.8875	0.57997	0.161765	0	40.1307	2.13362	38.0026	8.5	69	8.935	19.053	20.498	51.798	100				83	25.6173	1	1	113	68.3333	83.2222	61.0005	94.9661	50.7486	48.4756	46.5614	0.510452	0.132353	43.9447	2.68065	31.0455	37	1.5
40-49	0	92	28.3951	0	0	0	104	72.5	83.0833	82.6664	116.135	88.7216	71.5718	23.6046	0.616282	0.397059	0.205882	25.2064	2.08372	39.8726		143	9.985	202.106	77.398	37.866	95				90	27.7778	0	0	125.25	87	99.75	65.4995	126.583	83.5856	50.2533	33.9677	0.396999	0.323529	41.3528	2.70859	36.8273		2.3
60-69	1	76	23.4568	1	1	0	129	77	94.4167	67.0005	124.752	77.521	83.8814	37.8597	0.672388	0.323529	0.220588	47.2305	3.16447	29.8365	24.5	113	15.788	14.051	13.657	76.12	95				78	24.0741	1	1	115	61.25	79.1667	50.8333	109.969	52.0136	64.2179	52.7015	0.583965	0.279412	59.5714	3.02821	26.1431	32	0.5
40-49	1	91	28.0864	1	1	0	105	68.5	80.5833	58.3338	73.1316	43.5847	44.207	40.4024	0.604485	0.264706	0.161765	30.8735	1.80097	44.7444	5.9	35	13.489	13.934	82.72	64.482	778	1341			91	28.0864	1	1	133	65.75	88.1667	62.0001	92.881	43.7825	42.5186	52.8617	0.457775	0.25	52.5815	3.26005	27.0445	142	3
60-69	1	74	22.8395	1	1	0	159	72.5	101.333	70.6	68.5708	40.9079	46.081	40.342	0.672021	0.264706	0	25.2078	1.77967	56.9393	12.8	96	20.163	28.31	14.849	119.735	60	2924			85	26.2346	1	1	151.25	80	103.75	61.4995	66.4498	30.5712	38.1079	53.9935	0.573484	0.117647	32.7238	2.0125	51.5528	39	4.1
40-49	0	85	26.2346	1	1	0	108	62	77.4167	70.1672	82.116	42.3768	53.2559	48.3939	0.648545	0.279412	0	39.3161	2.7587	28.0627		144	11.841	20.21	23.594	62.494	497	2700			76	23.4568	1	1	129.75	77.25	94.75	54.5004	93.2684	38.5684	42.9263	58.6479	0.460245	0.147059	45.2632	2.46686	38.4092	135	0.9
60-69	0	96	29.6296	1	1	1	150	81.5	104.417	87.834	71.3456	40.6531	47.2494	43.0194	0.662261	0.220588	0.0882353	29.3798	2.58055	40.463	59.3	114	18.161	10.489	28.464	41.654		4152			85	26.2346	1	1	109.25	63	78.4167	56.8333	92.6015	49.3123	38.7015	46.7479	0.417936	0.235294	36.7626	2.08934	37.5318	24	1.3
[truncated: 4 more columns]
